# Supplementary material
Source: MDPI journal article supplement (https://www.mdpi.com/2312-7481/4/4/57)
Supplement: s1 [file s1]

**Supplementary Materials**

Synthesis, Characterization and Magnetic Studies of a Tetranuclear Manganese(II/IV) Compound Incorporating an Amino-Alcohol Derived Schiff Base





**Figure S1.** Solid state FT-IR spectra of H3L and **1**.





**Figure S2.** Electronic spectrum of H3L recorded in acetonitrile at room temperature.


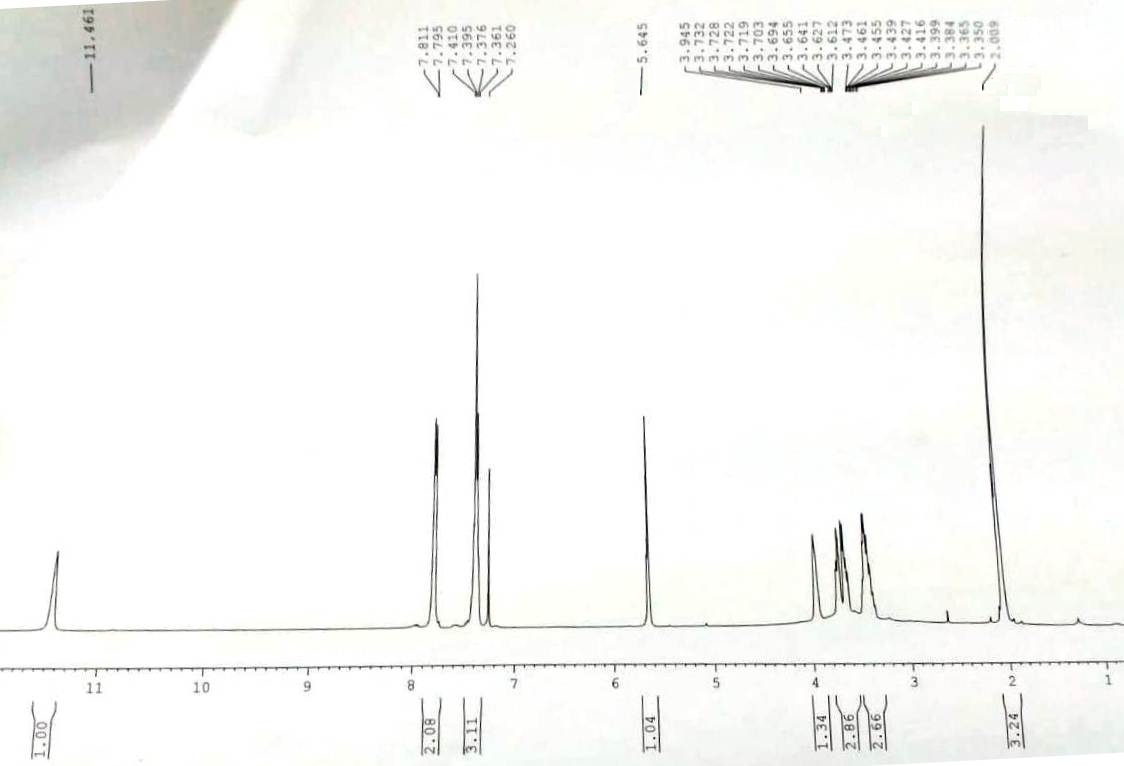


**Figure S3.** 1H NMR spectrum of H3L recorded in CDCl3.

**Table S1.** Crystal data and structure refinement parameters for **1.**

|  | **1** |
| --- | --- |
| Empirical formula | C39H42Cl3Mn4N3O10 |
| Formula weight | 1038.86 |
| Crystal size | 0.42x0.40x0.38 mm |
| Crystal system | Trigonal |
| Space group | R‒3 |
| a | 16.8979(7) Å |
| b | 16.8979(7) Å |
| c | 32.9041(15) Å |
| α | 90° |
| β | 90° |
| γ | 120° |
| Unit-cell volume, V | 8136.7(8) Å3 |
| Formula per unit cell, Z | 6 |
| Temperature | 100 K |
| Wavelength (Mo-Kα) | 0.71073 Å |
| Density, Dcalcd | 1.272 g cm-3 |
| Absorption coefficient, μ | 1.104 mm-1 |
| F (000) | 3168.0 |
| 2θrange for data collection | 3.046-52.934° |
| Index ranges | -20 ≤ h ≤ 21, -21 ≤ k ≤ 21  -41 ≤ l ≤ 40 |
| Reflections collected | 29630 |
| Independent reflections | 3717 [Rint = 0.0389, Rsigma = 0.0242] |
| Observed data [I>2σ(I)] | 3232 |
| Data/restraints/parameters | 3717/0/ 190 |
| Final R indices [I>=2σ (I)] | R1 = 0.0841, wR2 = 0.2529 |
| R indices [all data] | R1 = 0.0938, wR2 = 0.2682 |
| Goodness-of-fit on F2 | 1.132 |
| Largest diff. peak/hole (e.Å-3) | 2.43/-0.89 |
